# Supplementary material for: Chiral introduction of positive charges to PNA for double-duplex invasion to versatile sequences
Source: PubMed Central journal article supplement — Nucleic Acids Res. 2008 Jan 18;36(5):1464–71. doi: 10.1093/nar/gkm1154 (PMC2275137; doi:10.1093/nar/gkm1154), 2008-01-18
Supplement: nar_gkm1154_1.pdf [file nar_gkm1154_1.pdf]

## Supporting Material

### Chiral Introduction of Positive Charges to PNA for Double-duplex Invasion to Versatile Sequences

*Takumi Ishizuka, Junya Yoshida, Yoji Yamamoto, Jun Sumaoka, Tullia Tedeschi,  
Roberto Corradini, Stefano Sforza, and Makoto Komiyama*

DNA1 (used for invasion into G-C rich sequence; Figure 4)

TTGAGAGCCTTCAACCCAGTCAGCTCCTTCCGGTGGGCGCGGGGCATGAC  
TATCGTCCGCCCACTTATGACTGTCTTCTTTATCATGCAACTCGT**AGAC**  
target site 3  
**AGGTGC** target site 1 **CGGCAGCGCTC** target site 2 TGGGTCATTTTCGGCGAGGACCGCTTTCGCTGG  
AGCGCGACGATGATCGGCCTGTCGCTTGCGGTATTCGGAATCTTGCACGC  
CCTCGCTCAAGCCTTCGTCACTGGTC

DNA2 (used for invasion into A-T rich sequence; Figures 5, 6 and 7)

TGCACCATTATGTTCCGGATCTGCATCGCAGGATGCTGCTGGCTACCCTG  
TGGAACACCTACATCTGTATTAACGAAGCGCTGGCATTGACCCTGAGTGA  
TTTTTCTCTGGTCCCGCCGCATCCATAACCGCCAGTTGTTTACCCTCACAA  
CGTTCCAGTAACCGGGCATGTTCA**TCATCAGTAA** target site 4 ACCCGTATCGTGAGCAT  
CCTCTCTCGTTTCATCGGTATCATTACCCCATGAACAGAAATCCCCCTT  
ACACGGAGGCATCAGTGACCAAACAGGAAAAAACCGCCCTTAACATGGCC  
CGCTTTATCAGAAGCCAGACATTAACGCTTCTGGAGAAACTCAACGAGCT  
GGACGCGGATGAACAGGCAGACATCTGTGAATCGCTTACGACCACGCTG  
ATGAGCTT

DNAs used for  $T_m$  measurements

DNA<sub>11c</sub> 5' - TCATCAGTAA - 3'

DNA<sub>12c</sub> 5' - TTAGTATGA - 3'

**Supplemental Figure 1.** DNA sequences used in this study.

DNA1 and DNA2 were prepared by PCR from pBR322 plasmid DNA, and used for invasion assay. DNA1 and DNA2 correspond to T665-C890 and T1651-T2058 in pBR322, respectively. The sequences in italic are the target site of PNAs; target site 1 (red) for PNA1-4, target site 2 (blue) for PNA5-8, target site 3 (bold) for PNA17, 18 and target site 4 (black bold) for PNA9-16. DNA<sub>11c</sub> and DNA<sub>12c</sub> are used for  $T_m$  measurements.

**Supplemental Table 1.** PNA sequences used in this study

|       | sequence <sup>a)</sup>                                                                                    | D and U <sub>s</sub> | G and C | chiral unit | cation |
|-------|-----------------------------------------------------------------------------------------------------------|----------------------|---------|-------------|--------|
| PNA1  | H <sub>2</sub> N- (Lys) CCU <sub>s</sub> GU <sub>s</sub> CCDCG (Lys) -H                                   | 3                    | 7       | 0           | 3      |
| PNA2  | H- (Lys) GGDCDGGU <sub>s</sub> GC (Lys) -NH <sub>2</sub>                                                  | 3                    | 7       | 0           | 3      |
| PNA3  | H <sub>2</sub> N- (Lys) CC <u>U<sub>s</sub></u> GU <sub>s</sub> CC <u>D</u> CG (Lys) -H                   | 3                    | 7       | 2 (D)       | 5      |
| PNA4  | H- (Lys) GG <u>D</u> CDGG <u>U<sub>s</sub></u> GC (Lys) -NH <sub>2</sub>                                  | 3                    | 7       | 2 (D)       | 5      |
| PNA5  | H <sub>2</sub> N- (Lys) CCGU <sub>s</sub> CGCGDG (Lys) -H                                                 | 2                    | 8       | 0           | 3      |
| PNA6  | H- (Lys) GGCDGCGCU <sub>s</sub> C (Lys) -NH <sub>2</sub>                                                  | 2                    | 8       | 0           | 3      |
| PNA7  | H <sub>2</sub> N- (Lys) CCG <u>U<sub>s</sub></u> CGCG <u>D</u> G (Lys) -H                                 | 2                    | 8       | 2 (D)       | 5      |
| PNA8  | H- (Lys) GGC <u>D</u> GCGC <u>U<sub>s</sub></u> C (Lys) -NH <sub>2</sub>                                  | 2                    | 8       | 2 (D)       | 5      |
| PNA9  | H <sub>2</sub> N- (Lys) DGT <u>D</u> GU <sub>s</sub> CATU <sub>s</sub> (Lys) -H                           | 4                    | 3       | 0           | 3      |
| PNA10 | H- (Lys) U <sub>s</sub> CAU <sub>s</sub> CDGTAD (Lys) -NH <sub>2</sub>                                    | 4                    | 3       | 0           | 3      |
| PNA11 | H <sub>2</sub> N- (Lys) DG <u>T</u> DGU <sub>s</sub> C <u>A</u> TU <sub>s</sub> (Lys) -H                  | 4                    | 3       | 2 (D)       | 5      |
| PNA12 | H- (Lys) U <sub>s</sub> C <u>A</u> U <sub>s</sub> CDG <u>T</u> AD (Lys) -NH <sub>2</sub>                  | 4                    | 3       | 2 (D)       | 5      |
| PNA13 | H <sub>2</sub> N- (Lys) DG <u>T</u> DGU <sub>s</sub> C <u>A</u> TU <sub>s</sub> (Lys) -H                  | 4                    | 3       | 2 (L)       | 5      |
| PNA14 | H- (Lys) U <sub>s</sub> C <u>A</u> U <sub>s</sub> CDG <u>T</u> AD (Lys) -NH <sub>2</sub>                  | 4                    | 3       | 2 (L)       | 5      |
| PNA15 | H <sub>2</sub> N- (Lys) <sub>2</sub> DGT <u>D</u> GU <sub>s</sub> CATU <sub>s</sub> (Lys) <sub>2</sub> -H | 4                    | 3       | 0           | 5      |
| PNA16 | H- (Lys) <sub>2</sub> U <sub>s</sub> CAU <sub>s</sub> CDGTAD (Lys) <sub>2</sub> -NH <sub>2</sub>          | 4                    | 3       | 0           | 5      |
| PNA17 | H <sub>2</sub> N- (Lys) GGCCG <u>U<sub>s</sub></u> CGCG (Lys) -H                                          | 1                    | 9       | 1           | 4      |
| PNA18 | H- (Lys) CCGGC <u>D</u> GCGC (Lys) -NH <sub>2</sub>                                                       | 1                    | 9       | 1           | 4      |

a) D and U<sub>s</sub> bear 2,6-diaminopurine and 2-thiouracil in place of conventional bases, respectively. Chiral units are underlined (e.g. A, T).

**Supplemental Table 2.** Molecular mass of PNAs measured by MALDI-TOF Mass Spectrometry

|       | sequence <sup>a)</sup>                                                                                    | theoretical $m/z$ | observed $m/z$ |
|-------|-----------------------------------------------------------------------------------------------------------|-------------------|----------------|
| PNA1  | H <sub>2</sub> N- (Lys) CCU <sub>s</sub> GU <sub>s</sub> CCDCG (Lys) -H                                   | 2937.2            | 2937.4         |
| PNA2  | H- (Lys) GGDCDGGU <sub>s</sub> GC (Lys) -NH <sub>2</sub>                                                  | 3079.3            | 3079.1         |
| PNA3  | H <sub>2</sub> N- (Lys) CC <u>U<sub>s</sub></u> GU <sub>s</sub> CC <u>D</u> CG (Lys) -H                   | 3081.0            | 3079.2         |
| PNA4  | H- (Lys) GG <u>D</u> CDGG <u>U<sub>s</sub></u> GC (Lys) -NH <sub>2</sub>                                  | 3223.4            | 3220.9         |
| PNA5  | H <sub>2</sub> N- (Lys) CCGU <sub>s</sub> CGCGDG (Lys) -H                                                 | 3000.2            | 3000.2         |
| PNA6  | H- (Lys) GGCDGCGCU <sub>s</sub> C (Lys) -NH <sub>2</sub>                                                  | 3000.2            | 3000.1         |
| PNA7  | H <sub>2</sub> N- (Lys) CCG <u>U<sub>s</sub></u> CGCG <u>D</u> G (Lys) -H                                 | 3142.4            | 3142.0         |
| PNA8  | H- (Lys) GGC <u>D</u> GCGC <u>U<sub>s</sub></u> C (Lys) -NH <sub>2</sub>                                  | 3142.4            | 3141.5         |
| PNA9  | H <sub>2</sub> N- (Lys) DGT <u>D</u> GU <sub>s</sub> CATU <sub>s</sub> (Lys) -H                           | 3030.2            | 3030.7         |
| PNA10 | H- (Lys) U <sub>s</sub> CAU <sub>s</sub> CDGTAD (Lys) -NH <sub>2</sub>                                    | 2999.2            | 2999.0         |
| PNA11 | H <sub>2</sub> N- (Lys) DG <u>T</u> DGU <sub>s</sub> C <u>A</u> TU <sub>s</sub> (Lys) -H                  | 3172.3            | 3172.4         |
| PNA12 | H- (Lys) U <sub>s</sub> C <u>A</u> U <sub>s</sub> CDG <u>T</u> AD (Lys) -NH <sub>2</sub>                  | 3141.3            | 3141.4         |
| PNA13 | H <sub>2</sub> N- (Lys) DG <u>T</u> DGU <sub>s</sub> C <u>A</u> TU <sub>s</sub> (Lys) -H                  | 3172.3            | 3172.1         |
| PNA14 | H- (Lys) U <sub>s</sub> C <u>A</u> U <sub>s</sub> CDG <u>T</u> AD (Lys) -NH <sub>2</sub>                  | 3141.3            | 3140.8         |
| PNA15 | H <sub>2</sub> N- (Lys) <sub>2</sub> DGT <u>D</u> GU <sub>s</sub> CATU <sub>s</sub> (Lys) <sub>2</sub> -H | 3286.4            | 3286.5         |
| PNA16 | H- (Lys) <sub>2</sub> U <sub>s</sub> CAU <sub>s</sub> CDGTAD (Lys) <sub>2</sub> -NH <sub>2</sub>          | 3255.4            | 3255.3         |
| PNA17 | H <sub>2</sub> N- (Lys) GGCCG <u>U<sub>s</sub></u> CGCG (Lys) -H                                          | 3072.3            | 3072.1         |
| PNA18 | H- (Lys) CCGGC <u>D</u> GCGC (Lys) -NH <sub>2</sub>                                                       | 3054.4            | 3054.2         |

a) D and U<sub>s</sub> bear 2,6-diaminopurine and 2-thiouracil in place of conventional bases, respectively. Chiral units are underlined (e.g. A, T).

**(a) PNA5/PNA6 (without chiral PNA monomers)**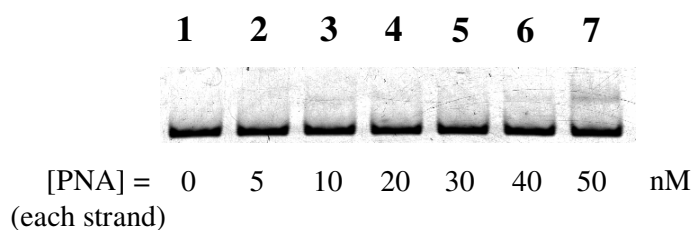**(b) PNA7/PNA8 (with chiral PNA monomers)**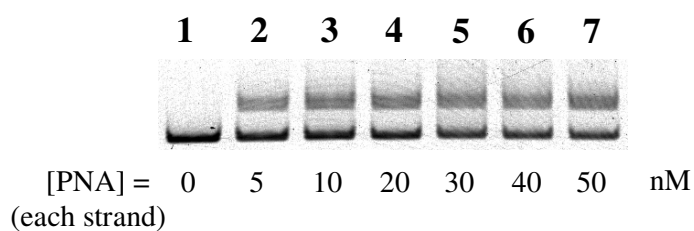

**Supplemental Figure 2.** Effect of PNA concentration on the formation of invasion complex.

(a) PNA5/PNA6 (without chiral PNA monomers), (b) PNA7/PNA8 (with chiral PNA monomers).

Invasion conditions: [DNA1] = 5 nM at pH 7.0 (Hepes buffer) and 50 °C, 1.5 h. The gel-shift assay was performed at 20 °C.

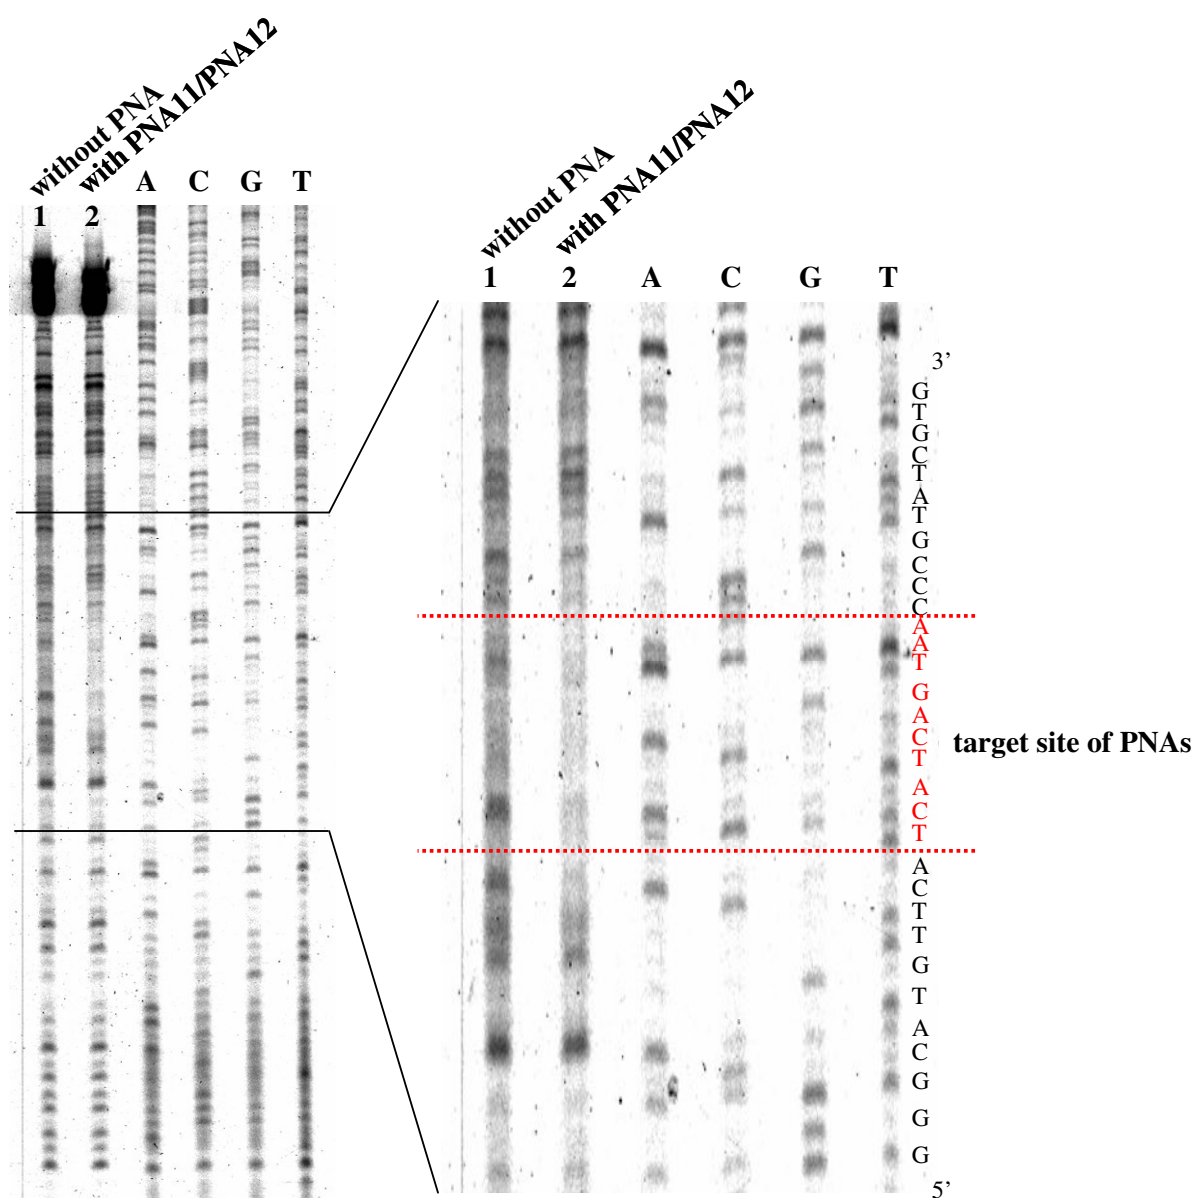

**Supplemental Figure 3.** DNase I foot printing assay for the invasion complex composed of PNA11 and PNA12. A 150-mer double stranded DNA labeled at 5'-end of one strand with FAM was used as the substrate. Lane 1, without PNA; lane 2, with PNA11 and PNA12; A, C, G, T, the Sanger standard lanes. Invasion conditions: [FAM-labeled DNA] = 1  $\mu$ M, [PNA11] = [PNA12] = 3  $\mu$ M, [Hepes] = 5 mM, pH 7.0, 50  $^{\circ}$ C, 1 h. After the invasion complex was formed in 30  $\mu$ l solution, 3  $\mu$ l of 0.2 U/ $\mu$ l DNase I and 3  $\mu$ l of DNase I buffer (both from Takara) were added, and then incubated for 15 minutes at 16  $^{\circ}$ C. The resultant digests were subjected to 10% denaturing PAGE.
